# Supplementary material
Source: PubMed Central journal article supplement (PMC7034363)

A

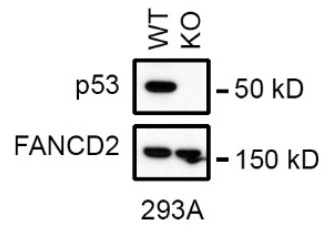

WT CCTGAAAACAACGTTCTGGTAAGGACAAGGGTTGGGCTGGGGACCTGGAGGGC  
 Allele1 CCTGAA -----TTCTGGTAAGGACAAGGGTTGGGCTGGGGACCTGGAGGGC  
 Allele2 CCTGAAAACAAC -----GGGC

B

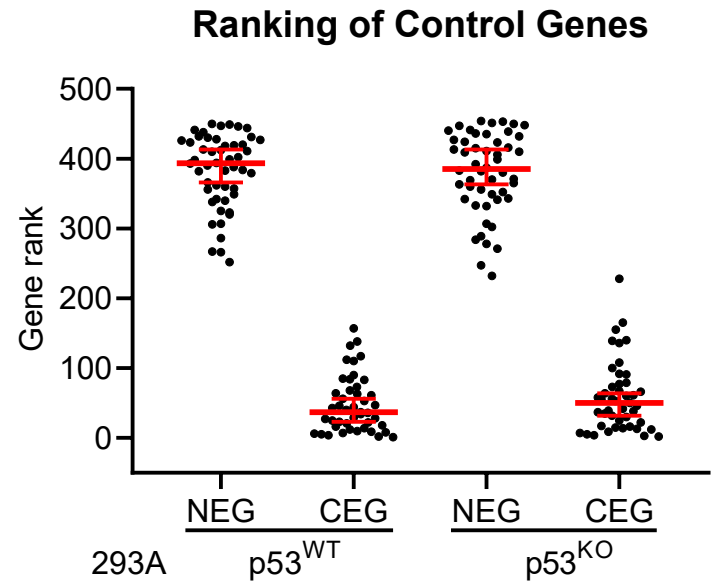

C

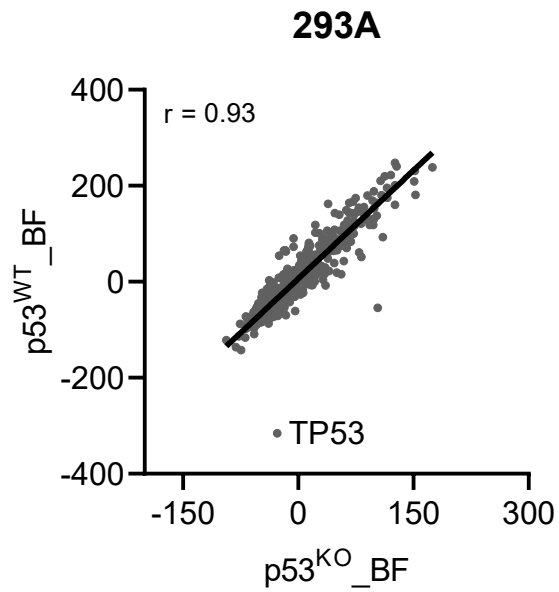

D

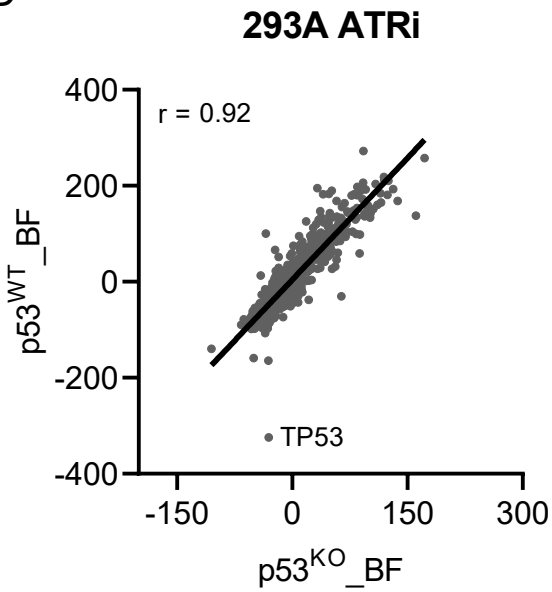

E

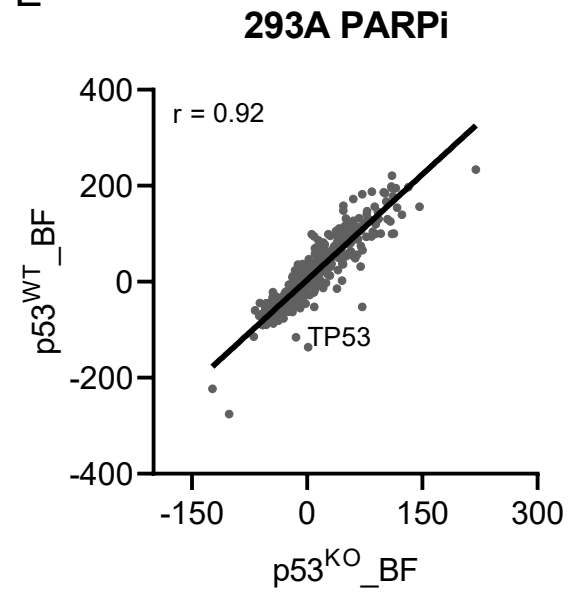

Supplement: NIHMS1552221-supplement-9.pdf [file NIHMS1552221-supplement-9.pdf]
