# Supplementary material
Source: PubMed Central journal article supplement (PMC7034363)

A

Boxplot for reads distribution

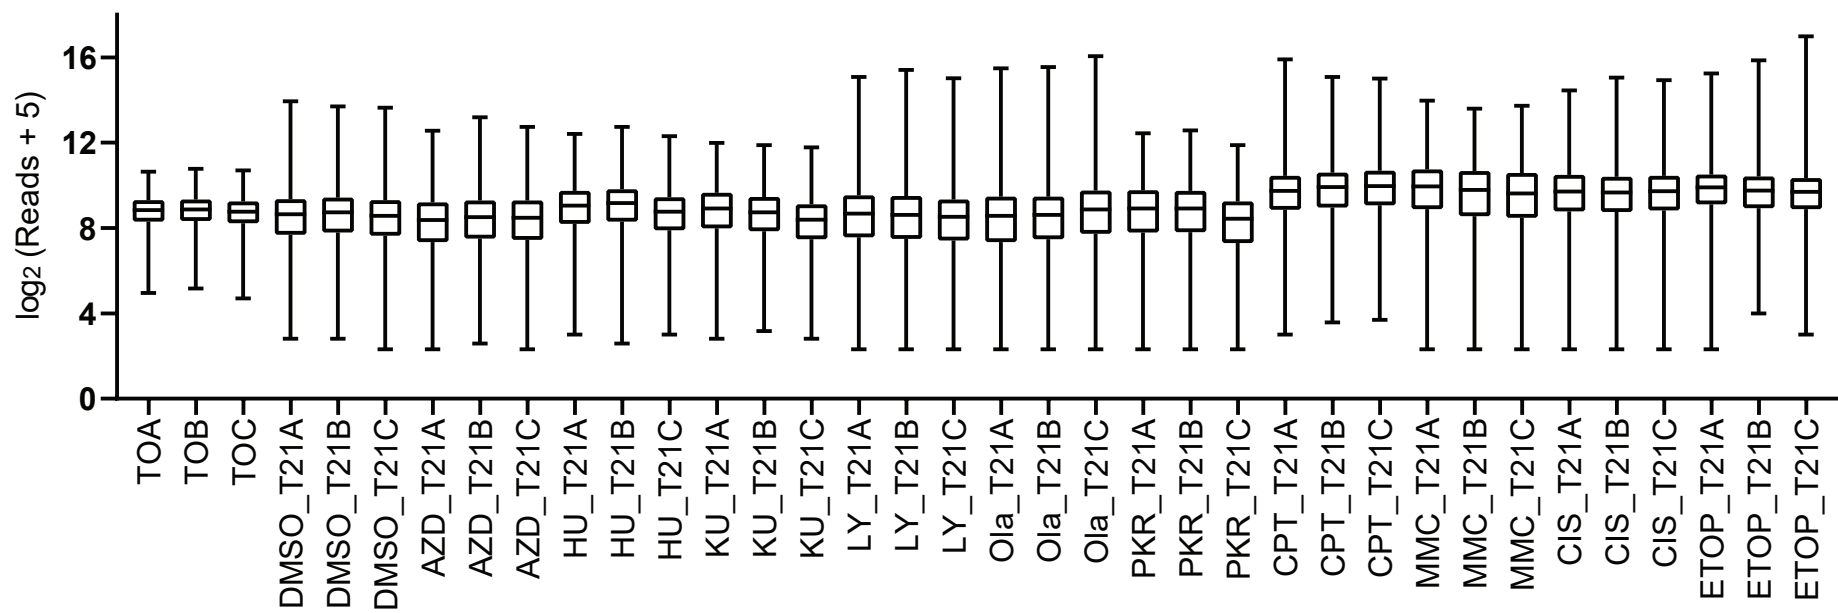

B

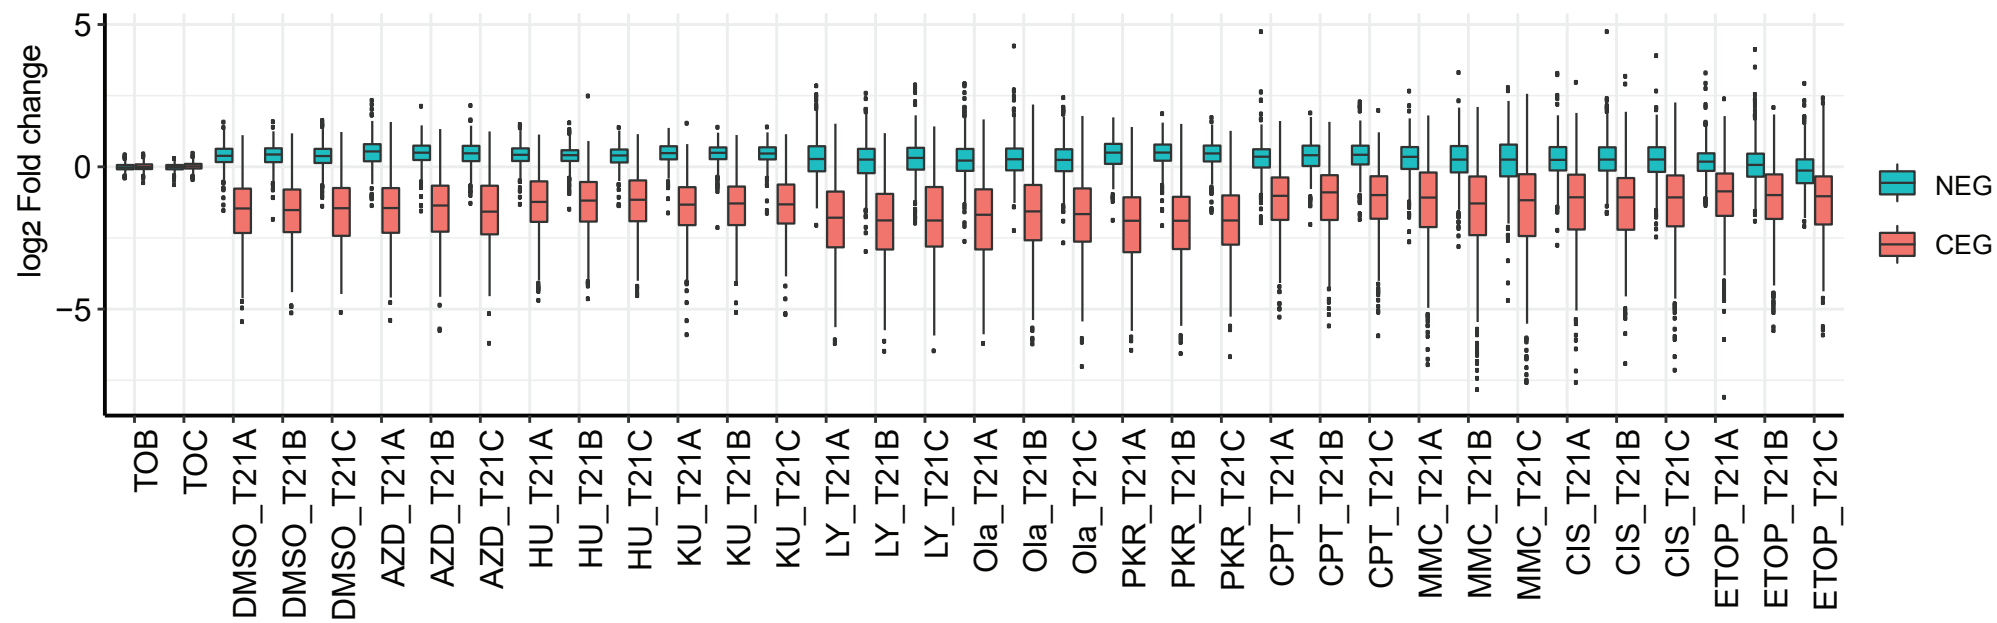

Supplement: NIHMS1552221-supplement-7.pdf [file NIHMS1552221-supplement-7.pdf]
